# Supplementary material for: Predicting the geographical distribution and niche characteristics of Cotoneaster multiflorus based on future climate change
Source: Front Plant Sci. 2024 May 8;15:1360190. doi: 10.3389/fpls.2024.1360190 (PMC11109598; doi:10.3389/fpls.2024.1360190)
Supplement: Supplementary file 1 [file Table_1.xls]

## Sheet: supplementary1 
Correlation analysis of climate factors
	bio1	bio2	bio3	bio4	bio5	bio6	bio7	bio8	bio9	bio10	bio11	bio12	bio13	bio14	bio15	bio16	bio17	bio18	bio19
bio1	1	-.584**	-.389**	0.0631749	.809**	.857**	-.157**	.877**	.821**	.880**	.835**	.437**	.480**	.505**	-.158**	.446**	.478**	.391**	.440**
bio2	-.584**	1	.476**	.194**	-.288**	-.753**	.496**	-.417**	-.605**	-.418**	-.623**	-.652**	-.523**	-.589**	.420**	-.565**	-.564**	-.509**	-.508**
bio3	-.389**	.476**	1	-.743**	-.706**	-.087*	-.512**	-.670**	0.0846095	-.695**	0.0628331	.129**	.098*	-.153**	.107*	.156**	-.107*	.211**	-0.0568525
bio4	0.0631749	.194**	-.743**	1	.627**	-.420**	.944**	.506**	-.499**	.527**	-.495**	-.632**	-.479**	-.230**	.169**	-.588**	-.262**	-.601**	-.269**
bio5	.809**	-.288**	-.706**	.627**	1	.409**	.445**	.965**	.347**	.985**	.359**	-0.0567463	0.0536456	.238**	-0.0310813	-0.0308143	.199**	-0.0834397	.168**
bio6	.857**	-.753**	-.087*	-.420**	.409**	1	-.635**	.538**	.969**	.535**	.981**	.741**	.674**	.618**	-.299**	.704**	.606**	.654**	.569**
bio7	-.157**	.496**	-.512**	.944**	.445**	-.635**	1	.288**	-.658**	.309**	-.659**	-.775**	-.616**	-.406**	.267**	-.718**	-.426**	-.713**	-.417**
bio8	.877**	-.417**	-.670**	.506**	.965**	.538**	.288**	1	.458**	.985**	.485**	.094*	.222**	.303**	-0.00318582	.137**	.258**	.095*	.211**
bio9	.821**	-.605**	0.0846095	-.499**	.347**	.969**	-.658**	.458**	1	.462**	.989**	.720**	.658**	.594**	-.280**	.690**	.598**	.646**	.583**
bio10	.880**	-.418**	-.695**	.527**	.985**	.535**	.309**	.985**	.462**	1	.477**	0.0771142	.182**	.320**	-0.0564976	.103*	.283**	0.0471053	.246**
bio11	.835**	-.623**	0.0628331	-.495**	.359**	.981**	-.659**	.485**	.989**	.477**	1	.731**	.682**	.571**	-.234**	.712**	.565**	.670**	.536**
bio12	.437**	-.652**	.129**	-.632**	-0.0567463	.741**	-.775**	.094*	.720**	0.0771142	.731**	1	.887**	.739**	-.293**	.947**	.743**	.920**	.697**
bio13	.480**	-.523**	.098*	-.479**	0.0536456	.674**	-.616**	.222**	.658**	.182**	.682**	.887**	1	.566**	.097*	.975**	.565**	.973**	.515**
bio14	.505**	-.589**	-.153**	-.230**	.238**	.618**	-.406**	.303**	.594**	.320**	.571**	.739**	.566**	1	-.530**	.602**	.984**	.545**	.952**
bio15	-.158**	.420**	.107*	.169**	-0.0310813	-.299**	.267**	-0.00318582	-.280**	-0.0564976	-.234**	-.293**	.097*	-.530**	1	-0.0194657	-.539**	0.033645	-.546**
bio16	.446**	-.565**	.156**	-.588**	-0.0308143	.704**	-.718**	.137**	.690**	.103*	.712**	.947**	.975**	.602**	-0.0194657	1	.600**	.987**	.549**
bio17	.478**	-.564**	-.107*	-.262**	.199**	.606**	-.426**	.258**	.598**	.283**	.565**	.743**	.565**	.984**	-.539**	.600**	1	.540**	.981**
bio18	.391**	-.509**	.211**	-.601**	-0.0834397	.654**	-.713**	.095*	.646**	0.0471053	.670**	.920**	.973**	.545**	0.033645	.987**	.540**	1	.488**
bio19	.440**	-.508**	-0.0568525	-.269**	.168**	.569**	-.417**	.211**	.583**	.246**	.536**	.697**	.515**	.952**	-.546**	.549**	.981**	.488**	1
