# Supplementary material for: Predicting the geographical distribution and niche characteristics of Cotoneaster multiflorus based on future climate change
Source: Front Plant Sci. 2024 May 8;15:1360190. doi: 10.3389/fpls.2024.1360190 (PMC11109598; doi:10.3389/fpls.2024.1360190)
Supplement: Supplementary file 2 [file Table_2.xls]

## Sheet: supplementary2 
Field Survey Record of Cotoneaster multiflorus Samples
Quadrat No	Serial Number	Species	Number of plants(cluster number)	Crown diameter (m)	Height (m)	Longitude (E)	Latitude(N)	Altitude（m）	The degree of slope (°)	Slope position
S1	1	Lonicera praeflorens	5	0.42	1.6	106°22′15.94″	35°16′36.55″	2536.9	13	Uphill position
	2	Quercus mongolica	4	1.3	2
	3	Rhamnus tangutica	4	0.5	1.5
	4	Euonymus phellomanus	3	0.6	1.7
	5	Malus kansuensis	5	0.7	2
	6	Viburnum glomeratum	6	0.35	1.6
	7	Corylus mandshurica	6	0.32	1.5
	8	Rubus pileatus	7	0.43	1.4
	9	Viburnum opulus subsp.	3	0.3	0.7
	10	Syringa oblata	6	0.3	1.2
S2	1	Corylus mandshurica	4	0.3	1.5	106°22′5.44″	35°16′47.78″	2514.5	42	Mid slope position
	2	Euonymus nanus	6	0.43	1
	3	Prunus salicina	5	1.5	2
	4	Viburnum opulus subsp.	7	0.3	0.6
	5	Rosa bella	5	0.2	1.3
	6	Cotoneaster gracilis	14	0.45	1.6
	7	Salix tangii	5	0.53	1.8
	8	Smilax stans	4	0.23	1.3
	9	Eleutherococcus senticosus	6	0.2	1.3
	10	Viburnum mongolicum	6	0.45	1.4
	11	Philadelphus incanus	5	0.35	1.5
S3	1	Syringa oblata	6	0.35	1.5	106°22′5.42″	35°16′47.47″	2488.8	45	Mid slope position
	2	Prunus salicina	3	1.2	2.5
	3	Crataegus kansuensis	3	1	2
	4	Malus kansuensis	2	1.1	2
	5	Euonymus phellomanus	4	0.6	1.7
	6	Viburnum glomeratum	6	0.3	1.7
	7	Prunus hypoleuca	2	1.3	2
	8	Lonicera stephanocarpa	2	0.52	1.6
	9	Spiraea rosthornii	6	0.45	1.5
	10	Salix hypoleuca	5	0.65	1.8
	11	Lonicera maackii	3	0.52	1.3
S4	1	Cotoneaster multiflorus	15	0.63	1.6	106°22′47.38″	35°17′6.76″	2376.3	46	Mid slope position
	2	Rosa omeiensis f. pteracantha	8	0.65	1.6
	3	Prunus salicina	3	1.1	2
	4	Prunus hypoleuca	2	1.3	2
	5	Malus kansuensis	3	1.2	2
	6	Elaeagnus multiflora	2	0.63	1.7
	7	Euonymus phellomanus	4	0.6	1.7
	8	Cotoneaster gracilis	5	0.52	1.5
	9	Rubus pileatus	5	0.42	1.5
	10	Corylus mandshurica	6	0.35	1.5
	11	Physocarpus amurensis	3	0.43	0.7
S5	1	Sorbaria sorbifolia	12	1.8	0.55	106°14′8.5″	35°35′31.98″	2272.5	22	Downhill position
	2	Berberis dasystachya	5	1.5	0.45
	3	Rosa omeiensis f. pteracantha	6	1.6	0.6
	4	Crataegus kansuensis	5	2	0.7
	5	Malus hupehensis	4	2.5	1.2
	6	Syringa oblata	5	1.6	0.55
	7	Prunus salicina	3	2.5	1.3
	8	Cotoneaster multiflorus	8	1.7	0.6
	9	Viburnum opulus subsp.	4	1.8	0.5
	10	Cornus macrophylla	5	1.7	0.47
	1	Cotoneaster multiflorus	5	0.5	1.7
S6	2	Prunus tomentosa	3	1.2	2	106°14′8.8″	35°35′33.16″	2265.6	25	Downhill position
	3	Prunus salicina	2	1	2
	4	Berberis dasystachya	3	0.45	1.5
	5	Betula platyphylla	1	1	2.5
	6	Lonicera stephanocarpa	2	1	1.7
	7	Berberis circumserrata	2	0.52	1.5
	8	Viburnum mongolicum	3	0.45	1.5
	9	Viburnum glomeratum	3	0.35	1.7
	10	Sorbaria sorbifolia	5	0.4	1.6
	11	Corylus mandshurica	6	0.32	1.5
	12	Philadelphus incanus	4	0.32	1.6
	13	Syringa oblata	4	0.3	1.6
	14	Crataegus kansuensis	3	1.2	2
	15	Spiraea fritschiana	6	0.4	1.5
	16	Rhamnus parvifolia	2	0.45	1.5
	17	Viburnum opulus subsp.	8	0.4	1.8
	18	Quercus mongolica	1	1.3	2.5
	19	Rosa davurica	5	0.3	1.6
	20	Cornus macrophylla	4	0.3	1.7
	21	Smilax stans	2	0.25	1.4
S7	1	Spiraea ouensanensis	3	1.3	0.4	106°14′8.8″	35°35′33.16″	2265.6	25	Downhill position
	2	Philadelphus incanus	6	1.8	0.5
	3	Corylus mandshurica	22	1.5	0.3
	4	Cornus macrophylla	27	2	0.25
	5	Corylus heterophylla	42	1.7	0.3
	6	Viburnum mongolicum	6	0.7	0.25
	7	Berberis brachypoda	1	0.5	0.3
	8	Lespedeza bicolor	3	1.5	0.4
	9	Rhamnus tangutica	4	1.3	0.5
	10	Syringa oblata	7	1.8	0.3
	11	Cotoneaster multiflorus	6	1.6	0.4
	12	Rosa bella	10	0.5	0.2
	13	Quercus mongolica	8	1.7	0.3
S8	1	Crataegus kansuensis	8	2	0.7	106°20′19.63"	35°47′1.3"	2002	21	Downhill position
	2	Rubus pileatus	2	1.7	0.3
	3	Smilax stans	1	0.15	0.1
	4	Viburnum opulus subsp.	34	2.5	0.7
	5	Rosa bella	5	1.6	0.4
	6	Corylus mandshurica	8	1.5	0.3
	7	Euonymus oxyphyllus	3	1.7	0.6
	8	Syringa oblata	4	1.7	0.4
	9	Philadelphus incanus	5	1.7	0.4
	10	Viburnum mongolicum	4	1.5	0.5
S9	1	Syringa oblata	15	0.5	0.32	106°20′17.68″	35°47′3.78″	2025	55	Uphill position
	2	Corylus mandshurica	4	0.8	0.2
	3	Cornus macrophylla	15	2	0.3
	4	Crataegus kansuensis	5	2	0.3
	5	Spiraea ouensanensis	4	0.7	0.3
	6	Cotoneaster gracilis	10	0.7	0.3
	7	Quercus mongolica	3	1.5	0.2
	8	Rosa bella	3	0.5	0.15
	9	Philadelphus incanus	3	1.8	0.4
	10	Lonicera ferdinandi	3	2	1.3
	11	Viburnum mongolicum	6	0.7	0.2
	12	Viburnum opulus subsp.	3	1.8	0.45
S10	1	Corylus mandshurica	7	1.6	0.3	106°20′6.34″	35°47′0.26″	2017	47	Uphill position
	2	Cornus macrophylla	6	1.8	0.45
	3	Rosa bella	5	1.3	0.65
	4	Viburnum opulus subsp.	5	1.4	0.6
	5	Sorbaria sorbifolia	7	1.6	0.45
	6	Cotoneaster multiflorus	6	1.6	0.4
	7	Spiraea ouensanensis	4	1.5	0.35
	8	Quercus mongolica	5	1.7	0.32
	9	Crataegus kansuensis	6	2	0.6
	10	Rosa omeiensis f. pteracantha	5	1.4	0.35
	11	Lonicera ferdinandi	2	1.5	0.55
	12	Euonymus oxyphyllus	3	1.5	0.5
S11	1	Prunus salicina	2	0.3	1.3	106°14′17.83″	106°14′17.84″	2127.8	32	Downhill position
	2	Viburnum opulus subsp.	9	0.45	0.5
	3	Rosa sweginzowii	7	0.3	2.5
	4	Syringa oblata	11	0.3	1.5
	5	Corylus mandshurica	15	0.25	1.5
	6	Cotoneaster multiflorus	14	0.4	1.5
	7	Crataegus kansuensis	17	0.35	1.5
	8	Cotinus coggygria	6	0.3	1
	9	Malus baccata	2	0.3	1.8
	10	Philadelphus incanus	8	0.3	1
	11	Rhamnus parvifolia	3	0.25	1
	12	Lonicera maackii	7	0.3	2
	13	Rosa bella	5	0.2	1.3
	14	Viburnum mongolicum	1	0.35	1
	15	Litsea pungens	3	0.25	1.2
S12	1	Cornus macrophylla	4	0.25	2.5	106°14′18.74″	106°14′18.75″	2102.4	20	Downhill position
	2	Crataegus kansuensis	10	1.3	2
	3	Viburnum opulus subsp.	5	0.3	0.5
	4	Cotoneaster multiflorus	12	0.75	1
	5	Cotinus coggygria	8	0.35	1
	6	Lonicera maackii	5	0.35	1
	7	Philadelphus incanus	7	0.3	1.5
	8	Corylus mandshurica	8	0.15	1.5
	9	Syringa oblata	5	0.2	1
	10	Malus baccata	5	0.35	2
	11	Viburnum mongolicum	6	0.2	0.5
S13	1	Crataegus kansuensis	10	0.8	2.5	106°12′59.03″	106°12′59.04″	2537	50	Uphill position
	2	Viburnum opulus subsp.	3	0.35	0.4
	3	Cotoneaster multiflorus	6	0.4	1.5
	4	Cotinus coggygria	4	0.35	0.9
	5	Philadelphus incanus	5	0.3	1.5
	6	Viburnum mongolicum	6	0.25	1
	7	Rosa tsinglingensis	4	0.2	1.5
	8	Lonicera maackii	3	0.25	1.5
	9	Corylus mandshurica	5	0.25	0.5
	10	Syringa oblata	16	0.2	1
S14	1	Corylus mandshurica	8	0.25	1	106°12′54.34″	106°12′54.35″	2560.5	47	Uphill position
	2	Cornus macrophylla	5	0.3	2
	3	Cotinus coggygria	6	0.35	1.5
	4	Philadelphus incanus	7	0.3	1
	5	Viburnum mongolicum	6	0.2	1
	6	Syringa oblata	11	0.2	1.5
	7	Malus baccata	2	0.15	1.5
	8	Crataegus kansuensis	9	0.45	2
	9	Cotoneaster multiflorus	14	0.5	1.5
	10	Spiraea ouensanensis	5	0.4	1
S15	1	Corylus mandshurica	20	0.15	1.5	106°18′40.41″	106°18′40.42″	2055	37	Mid slope position
	2	Smilax stans	5	0.55	0.5
	3	Sorbaria sorbifolia	3	1.1	1.8
	4	Lonicera tangutica	7	0.54	1.3
	5	Cotoneaster gracilis	6	0.67	1.5
	6	Cotoneaster multiflorus	7	0.78	2.3
	7	Syringa oblata	8	0.3	2
	8	Berberis dasystachya	6	0.35	1.1
	9	Viburnum mongolicum	5	0.2	0.8
	10	Crataegus kansuensis	7	1.2	1.7
	11	Philadelphus incanus	11	0.15	0.3
	12	Fargesia spathacea	12	0.45	1.2
S16	1	Acer davidii	2	1.3	2.5	106°18′40.09″	106°18′40.10″	2021	16	Downhill position
	2	Tilia tuan	1	1.5	2.7
	3	Cornus macrophylla	5	0.5	2.1
	4	Corylus mandshurica	12	0.3	1.9
	5	Cotoneaster gracilis	5	0.58	1.4
	6	Cotoneaster multiflorus	5	1.1	1.9
	7	Syringa oblata	7	0.4	2.1
	8	Fargesia spathacea	15	0.34	1.3
	9	Philadelphus incanus	11	0.35	1.7
	10	Crataegus kansuensis	1	1.5	2.2
	11	Viburnum mongolicum	5	0.35	1.2
	12	Quercus mongolica	2	1.6	2.3
	13	Rosa tsinglingensis	4	0.68	1.8
	14	Berberis dasystachya	7	0.4	1.6
	15	Lonicera tangutica	2	0.46	1.4
S17	1	Eleutherococcus senticosus	4	0.25	0.7	106°19′7.38″	106°19′7.39″	1992	47	Downhill position
	2	Prunus salicina	3	0.46	1.7
	3	Viburnum glomeratum	5	0.3	1.6
	4	Cornus macrophylla	7	0.8	1.9
	5	Acer davidii	4	1.5	2.3
	6	Tilia paucicostata	1	1.5	2.4
	7	Crataegus kansuensis	2	0.8	1.8
	8	Quercus mongolica	2	1.5	2.4
	9	Prunus tomentosa	1	1.3	1.9
	10	Viburnum mongolicum	8	0.3	0.8
	11	Fargesia spathacea	13	0.2	1.3
	12	Philadelphus incanus	7	0.5	2.2
	13	Corylus mandshurica	6	0.6	2.6
	14	Smilax stans	4	0.3	0.7
	15	Cotoneaster gracilis	2	0.55	1.2
	16	Cotoneaster multiflorus	7	0.35	1.8
S18	1	Spiraea salicifolia	4	0.5	0.9	106°16′22.35″	106°16′22.36″	2158.1	38	Downhill position
	2	Cornus macrophylla	5	0.58	2
	3	Tilia paucicostata	1	1.5	2.6
	4	Quercus mongolica	2	1.5	2.5
	5	Eleutherococcus senticosus	7	0.34	0.7
	6	Acer davidii	8	0.6	2.2
	7	Crataegus kansuensis	3	1	2.5
	8	Syringa oblata	7	0.35	1.8
	9	Fargesia spathacea	12	0.32	0.8
	10	Cotoneaster multiflorus	13	0.3	1.7
	11	Corylus mandshurica	15	0.4	1.8
	12	Lonicera tangutica	4	0.5	1.2
	13	Sorbaria sorbifolia	5	0.5	1.7
	14	Smilax stans	7	0.3	0.6
	15	Rhamnus davurica	2	0.7	1.3
S19	1	Sorbaria sorbifolia	27	0.5	2	106°16′18.49″	106°16′18.50″	2195	28	Downhill position
	2	Cotoneaster multiflorus	33	0.45	2
	3	Spiraea mollifolia	7	0.3	0.5
	4	Cornus macrophylla	12	0.4	2.5
	5	Quercus mongolica	2	1	2
	6	Lonicera tragophylla	4	0.3	1.5
	7	Viburnum glomeratum	8	0.35	2
	8	Corylus mandshurica	12	0.3	1.7
	9	Euonymus phellomanus	6	0.8	2
	10	Syringa oblata	8	0.6	2
S20	1	Sorbaria sorbifolia	13	0.55	1.7	106°16′21.2″	106°16′21.3″	2167	7	Downhill position
	2	Viburnum glomeratum	6	0.4	1.6
	3	Berberis dasystachya	5	0.65	1.5
	4	Spiraea fritschiana	12	0.4	1.5
	5	Euonymus phellomanus	2	0.7	1.7
	6	Syringa oblata	5	0.52	1.6
	7	Lonicera maackii	3	0.65	1.8
	8	Cornus macrophylla	7	0.32	1.8
	9	Cotoneaster multiflorus	10	0.55	1.7
	10	Rhamnus parvifolia	5	0.42	1.5
	11	Viburnum mongolicum	7	0.35	1.3
	12	Lonicera ferdinandi	2	0.53	1.9
	13	Philadelphus incanus	6	0.36	1.9
	14	Lonicera tangutica	5	0.51	1.6
	15	Lonicera stephanocarpa	2	0.55	1.9
	16	Rosa omeiensis f. pteracantha	8	0.35	1.7
S21	1	Berberis circumserrata	7	0.45	1.5	106°16′22.88″	106°16′22.89″	2164.7	5	Downhill position
	2	Rosa bella	6	0.3	1.6
	3	Lonicera tangutica	5	0.3	1.5
	4	Cotoneaster submultiflorus	7	0.35	1.6
	5	Crataegus kansuensis	4	0.65	2.5
	6	Sorbaria sorbifolia	10	0.4	1.6
	7	Lonicera chrysantha	4	0.52	1.8
	8	Prunus tomentosa	3	1.3	2.5
	9	Corylus mandshurica	8	0.41	1.5
	10	Rosa omeiensis f. pteracantha	7	0.35	1.7
	11	Cotoneaster gracilis	6	0.45	1.6
	12	Lonicera webbiana	3	0.42	1.8
	13	Cotoneaster multiflorus	6	0.47	1.7
S22	1	Syringa reticulata	11	0.35	2	106°16′24.82″	106°16′24.83″	2140.7	4	Downhill position
	2	Viburnum glomeratum	7	0.35	1.7
	3	Viburnum mongolicum	6	0.42	1.6
	4	Cotoneaster submultiflorus	10	0.4	1.6
	5	Cotoneaster multiflorus	8	0.45	1.6
	6	Corylus mandshurica	7	0.32	1.5
	7	Sorbaria sorbifolia	12	0.53	1.7
	8	Rosa omeiensis	6	0.6	1.8
	9	Lonicera webbiana	4	0.6	2
	10	Rosa omeiensis f. pteracantha	6	0.45	1.9
	11	Cotoneaster gracilis	7	0.52	1.7
	12	Cotinus coggygria	4	0.45	1.5
	13	Lonicera maackii	3	0.63	1.7
	14	Lonicera tangutica	3	0.52	1.6
	15	Euonymus phellomanus	2	0.55	2
	16	Crataegus kansuensis	2	1.3	2.5
S23	1	Zabelia biflora	10	0.65	1.8	106°21′47.32″	106°21′47.33″	2336.4	18	Uphill position
	2	Cotoneaster multiflorus	7	0.45	1.7
	3	Prunus tomentosa	2	0.56	2
	4	Rhamnus tangutica	3	0.43	1.5
	5	Cotoneaster gracilis	6	0.52	1.6
	6	Berberis brachypoda	4	0.45	1.4
	7	Hippophae rhamnoides	3	1.2	2
	8	Sorbaria sorbifolia	5	0.43	1.6
	9	Syringa oblata	4	0.35	1.5
	10	Viburnum glomeratum	4	0.3	1.7
S24	1	Lonicera tangutica	5	0.42	1.6	106°21′51.22″	106°21′51.23″	2336.3	5	Uphill position
	2	Acer tataricum	3	0.58	2
	3	Rosa omeiensis	4	0.65	1.5
	4	Lonicera ferdinandi	3	0.55	1.7
	5	Corylus mandshurica	13	0.35	1.6
	6	Syringa oblata	3	0.34	1.6
	7	Lespedeza bicolor	3	0.58	1.5
	8	Sorbaria sorbifolia	8	0.52	1.7
	9	Spiraea ouensanensis	6	0.63	1.4
S25	1	Quercus mongolica	7	1.3	2.5	106°21′59.91″	106°21′59.92″	2380.6	36	Uphill position
	2	Corylus mandshurica	10	0.41	1.5
	3	Rosa bella	6	0.58	1.7
	4	Lonicera ferdinandi	4	0.62	1.6
	5	Spiraea rosthornii	6	0.6	1.5
	6	Euonymus oxyphyllus	3	0.75	1.8
	7	Euonymus nanus	2	0.43	1
	8	Smilax stans	4	0.23	1
	9	Euonymus phellomanus	3	0.7	1.7
	10	Euonymus verrucosus	2	0.63	1.8
S26	1	Crataegus kansuensis	5	1.3	2.5	106°21′28.22″	106°21′28.23″	2332.8	46	Uphill position
	2	Spiraea rosthornii	7	0.5	1.6
	3	Hippophae rhamnoides	3	0.7	2.3
	4	Prunus tomentosa	2	0.6	2
	5	Zabelia biflora	6	0.5	1.8
	6	Sorbaria sorbifolia	5	0.4	1.6
	7	Euonymus oxyphyllus	3	0.42	1.7
	8	Cotoneaster multiflorus	7	0.52	1.7
	9	Rosa bella	5	0.45	1.6
	10	Corylus mandshurica	8	0.43	1.5
S27	1	Viburnum opulus subsp.	8	0.15	2.5	106°20′14.57″	106°20′14.58″	2091.3	37	Mid slope position
	2	Rosa omeiensis f. pteracantha	6	0.1	2
	3	Corylus mandshurica	7	0.3	1.8
	4	Cotoneaster gracilis	2	0.35	1.8
	5	Viburnum glomeratum	5	0.4	2
	6	Clematoclethra scandens subsp. actinidioides	3	0.35	4
	7	Salix tangii	2	0.3	4.5
	8	Lonicera chrysantha	3	0.4	2
	9	Rubus pileatus	5	0.6	1.5
	10	Malus kansuensis	4	0.52	2.5
	11	Fargesia spathacea	7	0.32	1.3
	12	Euonymus phellomanus	2	0.3	2
	13	Syringa oblata	5	0.65	2
	14	Lonicera stephanocarpa	2	0.6	2.3
	15	Euonymus frigidus	2	0.52	2.5
	16	Sorbus koehneana	3	0.45	3
	17	Cotoneaster multiflorus	7	0.3	2
S28	1	Sorbaria sorbifolia	40	3	0.4	106°20′35.68″	106°20′35.69″	1968.7	36	Downhill position
	2	Cornus macrophylla	10	2.5	0.25
	3	Rosa omeiensis f. pteracantha	6	2.5	0.3
	4	Acer maximowiczii	5	2	0.35
	5	Euonymus phellomanus	3	2	0.35
	6	Fargesia nitida	6	1.3	0.2
	7	Rubus pileatus	10	1	0.25
	8	Cotoneaster multiflorus	10	2	0.3
	9	Cotoneaster submultiflorus	7	2	0.25
S29	1	Sorbaria sorbifolia	37	2.5	0.35	106°20′40.6″	106°20′40.7″	1929.6	46	Downhill position
	2	Cotoneaster multiflorus	41	2.3	0.3
	3	Crataegus kansuensis	5	2	1.5
	4	Lonicera ferdinandi	4	1.7	1.3
	5	Euonymus nanus	4	0.5	0.5
	6	Rhamnus davurica	2	1	0.4
	7	Prunus salicina	3	2.5	0.35
	8	Prunus davidiana	3	2.5	0.4
S30	1	Syringa reticulata	5	2	1.1	106°29′30.38″	106°29′30.39″	2104.7	43	Uphill position
	2	Crataegus kansuensis	3	2	1.3
	3	Cotoneaster gracilis	9	1.6	0.55
	4	Spiraea ouensanensis	6	1.5	0.43
	5	Lonicera ferdinandi	4	1.5	0.65
	6	Cotoneaster submultiflorus	5	1.6	0.53
	7	Euonymus nanus	3	1.5	0.42
	8	Rosa omeiensis f. pteracantha	7	1.7	0.53
	9	Prunus salicina	2	2	1
	10	Hippophae rhamnoides	4	2.3	1
	11	Cotoneaster multiflorus	5	1.6	0.52
	12	Prunus tomentosa	2	2	1.2
S31	1	Hippophae rhamnoides	5	2.5	1.3	106°28′8.24″	106°28′8.25″	1835	10	Downhill position
	2	Sorbaria sorbifolia	17	1.7	0.45
	3	Dasiphora glabra	6	1.5	0.58
	4	Syringa reticulata	4	2.5	1.3
	5	Berberis brachypoda	3	1.4	0.42
	6	Viburnum glomeratum	5	1.7	0.36
	7	Spiraea ouensanensis	7	1.5	0.67
	8	Cotoneaster multiflorus	8	1.7	0.53
	9	Euonymus nanus	3	0.4	0.32
	10	Malus baccata	2	2	1.2
S32	1	Rosa bella	21	1.5	0.4	106°11′24"	106°11′25"	2329.8	47	Mid slope position
	2	Cotoneaster multiflorus	20	2	0.7
	3	Quercus mongolica	5	2	0.9
	4	Syringa oblata	3	1.8	0.8
	5	Larix gmelinii var. principis-rupprechtii	1	1.4	0.9
	6	Crataegus kansuensis	3	2	1.3
S33	1	Cotoneaster multiflorus	18	1.8	0.7	106°11′38.83"	106°11′38.84"	2325	25	Downhill position
	2	Quercus mongolica	7	1.7	0.9
	3	Viburnum glomeratum	3	1.6	0.6
	4	Rosa bella	8	0.5	0.3
	5	Syringa oblata	5	2	0.31
S34	1	Syringa oblata	4	2.2	0.6	106°9′3.59"	106°9′3.60"	2213.3	30	Downhill position
	2	Cotoneaster multiflorus	15	1.8	0.57
	3	Quercus mongolica	5	1.8	0.7
	4	Rosa bella	12	1.2	0.55
	5	Crataegus kansuensis	4	2	1.2
	6	Prunus tomentosa	3	2.5	1.5
S35	1	Syringa oblata	6	1.7	0.34	106°8′24.08"	106°8′24.09"	2309	32	Mid slope position
	2	Prunus tomentosa	2	1.4	0.4
	3	Crataegus kansuensis	2	0.7	0.3
	4	Rosa bella	14	0.5	0.3
	5	Cotoneaster multiflorus	37	2	0.54
	6	Viburnum glomeratum	7	1.6	0.36
	7	Euonymus phellomanus	3	1.8	1
S36	1	Sorbaria sorbifolia	35	2.5	0.7	106°7′34.96"	106°7′34.97"	2035.1	40	Mid slope position
	2	Cotoneaster multiflorus	18	1.6	0.5
	3	Rosa bella	12	1.7	0.4
	4	Crataegus kansuensis	3	2	0.7
S37	1	Cotoneaster multiflorus	20	1.8	0.4	106°22′45.42″	106°22′45.43″	1856	23	Mid slope position
	2	Spiraea ouensanensis	5	1	0.5
	3	Berberis amurensis	3	1.2	0.45
	4	Syringa reticulata	10	1.9	1
	5	Spiraea blumei	6	1	0.3
	6	Berberis brachypoda	5	1.2	0.45
	7	Prunus davidiana	3	1.8	1.3
	8	Prunus salicina	2	1.9	1
	9	Lonicera rupicola	1	1.3	0.45
S38	1	Berberis amurensis	4	1.4	0.4	106°22′32.67″	106°22′32.68″	1700.5	31	Mid slope position
	2	Syringa reticulata	3	1.8	1
	3	Prunus davidiana	2	2	1.2
	4	Spiraea ouensanensis	4	1.5	0.45
	5	Berberis brachypoda	3	1.3	0.36
	6	Lonicera ferdinandi	1	1.6	0.6
	7	Hippophae rhamnoides	2	1.8	0.55
	8	Ostryopsis davidiana	14	1.1	0.32
	9	Lonicera rupicola	2	1.4	0.54
	10	Caragana korshinskii	5	1.5	0.48
S39	1	Lonicera ferdinandi	2	1.5	0.6	106°22′40.13″	106°22′40.14″	1723	11	Downhill position
	2	Cotoneaster gracilis	6	1.6	0.45
	3	Cotoneaster acutifolius	7	1.6	0.4
	4	Prunus davidiana	2	1.8	0.64
	5	Syringa reticulata	6	2	1
	6	Prunus salicina	3	2	1.1
	7	Crataegus kansuensis	4	2	1.2
S40	1	Rosa omeiensis f. pteracantha	5	1.4	0.35	106°26′10.98″	106°26′10.99″	1738.8	24	Downhill position
	2	Hippophae rhamnoides	2	2	1.3
	3	Armeniaca sibirica	2	2	1.3
	4	Syringa reticulata	8	2	1.2
	5	Berberis brachypoda	4	1.4	0.4
	6	Caragana korshinskii	6	1.5	0.5
	7	Lonicera rupicola	2	1.5	0.45
	8	Dasiphora glabra	3	1.4	0.4
	9	Rhamnus tangutica	3	1.3	0.45
S41	1	Euonymus verrucosus	2	1.5	0.2	106°26′7.33″	106°26′7.34″	1721.5	20	Downhill position
	2	Corylus mandshurica	17	0.6	0.2
	3	Spiraea rosthornii	3	1.3	0.3
	4	Quercus mongolica	5	2	0.3
	5	Cotoneaster multiflorus	18	1.8	0.2
	6	Rubus pileatus	5	0.4	0.15
	7	Lonicera tangutica	3	1.5	0.2
	8	Viburnum glomeratum	8	1.3	0.15
	9	Rhamnus tangutica	4	0.8	0.3
	10	Crataegus kansuensis	2	1.5	0.3
	11	Cornus macrophylla	3	1.8	0.25
	12	Syringa reticulata	2	2.5	0.3
S42	1	Corylus mandshurica	10	1.6	0.32	106°26′2.41″	106°26′2.42″	1702.7	15	Downhill position
	2	Cornus macrophylla	8	1.8	0.4
	3	Crataegus kansuensis	7	2	0.6
	4	Lonicera tangutica	3	1.5	0.5
	5	Syringa reticulata	5	2	1.2
	6	Rubus pileatus	4	1.3	0.3
	7	Rosa bella	5	1.2	0.25
	8	Spiraea rosthornii	4	1.5	0.3
	9	Euonymus verrucosus	2	1.8	0.3
S43	1	Malus kansuensis	3	2.5	1.3	106°20′17.71″	106°20′17.72″	1918.9	20	Mid slope position
	2	Lonicera ferdinandi	4	1.6	0.58
	3	Cornus macrophylla	6	1.8	0.33
	4	Berberis brachypoda	5	1.4	0.43
	5	Philadelphus incanus	7	1.5	0.31
	6	Prunus tomentosa	3	2.2	1.4
	7	Crataegus kansuensis	3	2.4	1.2
	8	Cotoneaster multiflorus	8	1.7	0.54
	9	Lonicera maackii	4	1.6	0.61
	10	Corylus mandshurica	8	1.5	0.31
S44	1	Cornus macrophylla	6	1.8	0.4	106°20′13.46″	106°20′13.47″	1913.4	8	Downhill position
	2	Lonicera maackii	2	1.7	0.55
	3	Spiraea rosthornii	3	1.4	0.31
	4	Spiraea blumei	2	1.3	0.21
	5	Philadelphus incanus	5	1.5	0.2
	6	Syringa reticulata	6	2	1
	7	Cotoneaster multiflorus	5	1.6	0.42
	8	Berberis brachypoda	2	1.2	0.4
	9	Quercus mongolica	3	1.8	0.6
	10	Corylus mandshurica	11	1.7	0.3
	11	Rhamnus parvifolia	2	1.3	0.41
S45	1	Corylus mandshurica	8	1.7	0.22	106°20′7.11″	106°20′7.12″	1888.8	10	Downhill position
	2	Cornus macrophylla	6	1.8	0.42
	3	Smilax stans	3	1.3	0.25
	4	Syringa reticulata	4	2	1.2
	5	Spiraea rosthornii	3	1.5	0.43
	6	Eleutherococcus senticosus	5	0.25	0.3
	7	Crataegus kansuensis	5	1.8	0.52
	8	Lonicera maackii	2	1.6	0.51
	9	Euonymus verrucosus	2	1.7	0.46
	10	Euonymus phellomanus	3	1.8	0.5
	11	Viburnum mongolicum	4	1.5	0.45
	12	Cotoneaster multiflorus	5	1.7	0.42
S46	1	Corylus mandshurica	36	2	0.4	106°24′30.12"	106°24′30.13"	1755.4	34	Downhill position
	2	Euonymus phellomanus	1	1.5	0.55
	3	Euonymus verrucosus	4	1.6	0.65
	4	Crataegus kansuensis	1	1.2	0.65
	5	Spiraea ouensanensis	2	1.5	0.6
	6	Syringa reticulata	3	1.7	0.55
	7	Dioscorea nipponica	1	0.5	0.15
	8	Ribes mandshuricum	4	1.2	0.35
	9	Eleutherococcus senticosus	4	0.5	0.3
	10	Lonicera tangutica	3	1.3	0.47
	11	Ulmus japonica	1	2.1	0.5
	12	Cotoneaster multiflorus	4	1.5	0.5
	13	Rosa bella	2	0.9	0.4
	14	Smilax stans	4	0.4	0.3
	15	Viburnum mongolicum	5	0.5	0.15
	16	Cornus macrophylla	2	2.2	0.75
	17	Acer tataricum	2	0.5	0.25
S47	1	Eleutherococcus senticosus	5	0.3	0.15	106°24′33.81"	106°24′33.82"	1762.8	47	Mid slope position
	2	Corylus mandshurica	7	1.8	0.4
	3	Cornus macrophylla	5	2.5	0.7
	4	Acer tataricum	4	3	1.5
	5	Crataegus kansuensis	3	2.5	1
	6	Lonicera tangutica	2	1.8	1.2
	7	Rosa bella	5	0.5	0.2
	8	Viburnum mongolicum	3	0.5	0.32
	9	Cotoneaster multiflorus	6	1.7	0.36
	10	Euonymus phellomanus	2	2	1.2
	11	Prunus tomentosa	3	2	1.5
	12	Zabelia biflora	4	1.6	0.5
S48	1	Corylus mandshurica	8	1.7	0.4	106°24′25.66"	106°24′25.67"	1751.3	10	Downhill position
	2	Eleutherococcus senticosus	6	0.3	0.2
	3	Rosa bella	6	1.5	0.15
	4	Berberis brachypoda	2	1	0.4
	5	Euonymus phellomanus	3	1.3	0.7
	6	Euonymus verrucosus	2	1.6	0.6
	7	Lonicera tangutica	2	1	0.6
	8	Philadelphus incanus	2	0.7	0.45
	9	Spiraea ouensanensis	8	1	0.45
	10	Acer tataricum	7	2	0.7
	11	Quercus mongolica	5	1.5	0.5
	12	Crataegus kansuensis	5	2	0.65
	13	Syringa reticulata	3	1.4	0.45
	14	Cornus macrophylla	5	2	0.3
S49	1	Rosa bella	8	1.5	0.15	106°26′12.09"	106°26′12.10"	1704.5	21	Downhill position
	2	Spiraea ouensanensis	7	1.2	0.4
	3	Cotoneaster multiflorus	6	1.6	0.35
	4	Viburnum opulus subsp.	2	0.4	0.2
	5	Ulmus japonica	1	2	0.7
	6	Prunus tomentosa	3	1.8	0.7
	7	Syringa reticulata	4	1.7	0.3
	8	Smilax stans	2	0.5	0.15
	9	Cornus macrophylla	6	2	0.4
	10	Eleutherococcus senticosus	4	0.4	0.25
	11	Corylus mandshurica	7	1.5	0.3
	12	Lonicera maackii	2	1.5	0.5
	11	Fraxinus chinensis	1	0.35	0.5
	12	Litsea pungens	1	0.23	0.3
S50	1	Acer tataricum	4	0.4	0.25	106°23′3.58"	106°23′3.59"	1769	5	Downhill position
	2	Eleutherococcus senticosus	6	0.3	0.15
	3	Syringa reticulata	7	1.8	0.15
	4	Berberis amurensis	4	0.7	0.3
	5	Lonicera ferdinandi	2	1.7	1.2
	6	Euonymus phellomanus	6	1.5	0.45
	7	Larix gmelinii	1	2	1
	8	Corylus mandshurica	5	0.8	0.3
S51	1	Philadelphus incanus	3	1.5	2	106°23′10.06"	106°23′10.07"	1801.3	20	Downhill position
	2	Syringa reticulata	3	2	0.42
	3	Acer tataricum	2	2	0.4
	4	Quercus mongolica	2	1.7	0.55
	5	Berberis brachypoda	3	1.3	0.25
	6	Larix gmelinii	1	1.5	0.6
	7	Viburnum farreri	1	1.7	0.34
	8	Corylus mandshurica	5	1.5	0.32
	9	Corylus heterophylla	2	1.5	0.3
	10	Lonicera ferdinandi	2	1.4	0.7
S52	1	Lonicera ferdinandi	2	1.3	0.4	106°23′14″	106°23′15″	1843.5	17	Mid slope position
	2	Cotoneaster multiflorus	6	1.5	0.55
	3	Spiraea ouensanensis	7	1.2	0.4
	4	Berberis amurensis	2	1.2	0.5
	5	Acer tataricum	5	2	1
	6	Eleutherococcus senticosus	4	0.4	0.2
	7	Corylus mandshurica	10	1.2	0.25
	8	Euonymus oxyphyllus	2	1.7	0.6
	9	Smilax stans	5	1	0.2
	10	Cornus macrophylla	4	2	0.35
S53	1	Cornus macrophylla	5	2	0.35	106°23′20″	106°23′21″	1843	32	Mid slope position
	2	Philadelphus incanus	3	1.3	0.2
	3	Rosa bella	5	1.2	0.2
	4	Corylus mandshurica	8	1.5	0.3
	5	Corylus heterophylla	4	1.6	0.3
	6	Eleutherococcus senticosus	6	0.6	0.25
	7	Euonymus phellomanus	2	1.7	0.7
	8	Syringa reticulata	3	1.8	0.6
	9	Rhamnus tangutica	3	1.3	0.45
	10	Lonicera tangutica	3	1.2	0.43
S54	1	Euonymus phellomanus	11	1.5	0.6	106°23′4.41"	106°23′4.42"	1761.9	15	Downhill position
	2	Viburnum glomeratum	6	1.7	0.3
	3	Acer tataricum	4	2	0.71
	4	Eleutherococcus senticosus	10	0.6	0.25
	5	Syringa reticulata	2	2	1.2
	6	Rhamnus parvifolia	3	1.3	0.45
	7	Ulmus pumila	1	1.7	0.6
S55	1	Viburnum opulus subsp.	5	0.4	0.5	106°20′39.22″	106°20′39.23″	1858.2	18	Downhill position
	2	Acer tataricum	4	2	1.3
	3	Euonymus verrucosus	6	1.8	1
	4	Berberis brachypoda	5	1.3	0.45
	5	Corylus mandshurica	8	1.5	0.25
	6	Viburnum glomeratum	3	1.7	0.3
	7	Lonicera ferdinandi	3	1.5	0.52
	8	Euonymus phellomanus	8	1.6	0.45
	9	Betula utilis	2	2	0.7
	10	Rosa bella	2	1.3	0.2
	11	Rhamnus parvifolia	3	1	0.25
S56	1	Crataegus kansuensis	5	2.5	1.2	106°13′6.69″	106°13′6.70″	2609	33	Uphill position
	2	Salix characta	6	2	0.4
	3	Cotoneaster acutifolius	5	1.5	1
	4	Viburnum glomeratum	5	1.8	0.3
	5	Euonymus phellomanus	2	0.3	0.2
	6	Berberis amurensis	3	0.9	0.35
	7	Rosa bella	4	1.6	0.7
	8	Betula platyphylla	2	2.5	1
	9	Hippophae rhamnoides	3	2	1
	10	Philadelphus incanus	2	1.7	0.3
	11	Sorbus koehneana	4	2	1
	12	Rosa omeiensis f. pteracantha	3	1.8	1
S57	1	Eleutherococcus senticosus	7	0.3	0.25	106°12′53.38″	106°12′53.39″	2624.5	25	Uphill position
	2	Berberis amurensis	4	1.2	0.4
	3	Fargesia nitida	12	0.8	0.2
	4	Spiraea blumei	6	0.5	0.2
	5	Rubus pileatus	6	1.2	0.4
	6	Lonicera tangutica	4	1.5	0.5
	7	Berberis circumserrata	4	1.5	0.4
	8	Philadelphus incanus	3	1.5	0.35
	9	Rosa bella	4	1.6	0.25
	10	Cotoneaster multiflorus	3	1.7	0.52
S58	1	Cotoneaster acutifolius	7	1.5	0.42	106°11′11.31″	106°11′11.32″	2162.5	32	Downhill position
	2	Hippophae rhamnoides	4	2	1
	3	Sorbus koehneana	5	2.5	1.3
	4	Rosa omeiensis f. pteracantha	6	1.8	0.7
	5	Fargesia nitida	12	1.3	0.2
	6	Euonymus phellomanus	3	1.5	0.6
	7	Crataegus kansuensis	5	2.3	0.5
	8	Malus kansuensis	4	2.5	0.5
	9	Philadelphus incanus	5	1.7	0.3
	10	Lonicera japonica var. chinensis	3	1.6	0.6
	11	Cotoneaster multiflorus	7	1.4	0.5
S59	1	Sorbus koehneana	4	2.5	1	106°11′13.79″	106°11′13.80″	2123.1	25	Downhill position
	2	Salix characta	6	2	1
	3	Rosa bella	5	1.6	0.7
	4	Rosa omeiensis f. pteracantha	5	1.8	0.8
	5	Lonicera japonica var. chinensis	4	1.6	0.5
	6	Fargesia nitida	10	1.3	0.25
	7	Crataegus kansuensis	6	2	1
	8	Viburnum mongolicum	5	1.4	0.35
	9	Berberis amurensis	4	1.5	0.42
S60	1	Euonymus verrucosus	1	1.2	0.6	106°20′25.21″	106°20′25.22″	1855.7	12	Downhill position
	2	Cotoneaster multiflorus	13	1.3	1.2
	3	Prunus tomentosa	7	2.1	0.5
	4	Rhamnus parvifolia	8	2.5	0.45
	5	Corylus mandshurica	2	1.8	0.7
	6	Syringa reticulata	6	1.8	0.4
	7	Lonicera tragophylla	5	1.7	0.2
	8	Quercus mongolica	2	1.9	0.4
	9	Euonymus phellomanus	3	1.2	0.4
S61	1	Berberis amurensis	1	1.9	0.35	106°20′31.65″	106°20′31.66″	1937.9	33	Downhill position
	2	Sorbaria sorbifolia	4	1.5	0.4
	3	Ulmus pumila	2	1	0.3
	4	Cornus macrophylla	2	2.5	0.4
	5	Viburnum glomeratum	5	1.7	0.4
	6	Viburnum opulus subsp.	3	0.2	0.35
	7	Lonicera ferdinandi	2	2	0.3
	8	Syringa reticulata	2	2.5	1.5
	9	Corylus mandshurica	6	1.5	0.4
	10	Cotoneaster multiflorus	7	1.7	0.51
S62	1	Corylus mandshurica	8	1.6	0.3	106°20′28.75″	106°20′28.76″	1888.5	16	Downhill position
	2	Syringa reticulata	5	2	0.6
	3	Hippophae rhamnoides	3	2	1.2
	4	Rhamnus parvifolia	4	1.5	0.42
	5	Lonicera maackii	2	1.6	0.65
	6	Ulmus davidiana var. japonica	2	1.8	0.61
	7	Cornus macrophylla	4	1.8	0.35
	8	Berberis amurensis	3	1.3	0.4
	9	Viburnum opulus subsp.	2	0.3	0.42
	10	Viburnum glomeratum	3	1.7	0.4
S63	1	Syringa reticulata	6	2	1	106°20′13.28″	106°20′13.29″	1869.8	22	Downhill position
	2	Cotoneaster multiflorus	7	1.7	0.7
	3	Sorbaria sorbifolia	5	1.8	0.53
	4	Spiraea ouensanensis	4	1.5	0.39
	5	Lonicera tragophylla	3	1.6	0.36
	6	Lonicera tangutica	3	1.5	0.42
	7	Prunus salicina	2	2	0.7
	8	Berberis brachypoda	2	1.3	0.36
	9	Quercus mongolica	3	1.4	0.42
S64	1	Philadelphus incanus	6	1.7	0.43	105°54′33.42"	105°54′33.43"	2049.2	30	Downhill position
	2	Cotoneaster acutifolius	8	1.6	0.54
	3	Crataegus kansuensis	4	2	1
	4	Quercus mongolica	2	3.5	2
	5	Prunus tomentosa	2	2.5	2
	6	Corylus mandshurica	6	1.6	0.4
	7	Lonicera ferdinandi	4	1.6	0.56
	8	Corylus heterophylla	7	1.5	0.3
S65	1	Crataegus kansuensis	3	2	1.5	105°45′23.88"	105°45′23.89"	2320.7	25	Downhill position
	2	Acer tataricum	2	2.5	1.6
	3	Cornus macrophylla	4	1.8	0.3
	4	Berberis brachypoda	5	1.4	0.45
	5	Quercus mongolica	2	2.5	2
	6	Euonymus phellomanus	5	1.8	1
	7	Prunus tomentosa	3	2	1
	8	Cerasus humilis	3	1.6	0.5
	9	Lonicera ferdinandi	3	1.5	0.54
S66	1	Corylus mandshurica	8	1.5	0.32	105°45′59.93"	105°45′59.94"	2119.7	23	Mid slope position
	2	Corylus heterophylla	6	1.5	0.33
	3	Cotoneaster multiflorus	9	1.6	0.56
	4	Rosa bella	5	1.4	0.4
	5	Philadelphus incanus	6	1.6	0.37
	6	Cotoneaster acutifolius	7	1.7	0.45
	7	Cerasus humilis	4	1.7	0.55
	8	Rhamnus parvifolia	4	1.3	0.45
	9	Lonicera maackii	3	1.6	0.57
S67	1	Cotoneaster multiflorus	8	1.5	0.41	106°8′2.34"	106°8′2.35"	2183	32	Downhill position
	2	Syringa oblata	1	1.6	0.35
	3	Ostryopsis davidiana	9	1.3	0.3
	4	Fargesia nitida	10	1.3	0.25
	5	Cornus macrophylla	5	1.8	0.3
	6	Berberis brachypoda	3	1.5	0.4
	7	Rosa bella	3	1.5	0.35
	8	Tamarix chinensis	2	1.4	0.4
S68	1	Rosa bella	7	1.5	0.4	105°59′51.73"	105°59′51.74"	2162.3	25	Uphill position
	2	Ostryopsis davidiana	6	1.4	0.3
	3	Philadelphus incanus	6	1.6	0.4
	4	Hippophae rhamnoides	1	2	1.2
	5	Cotoneaster multiflorus	6	1.6	0.4
	6	Spiraea ouensanensis	5	1.5	0.5
	7	Lonicera maackii	3	1.6	0.6
S69	1	Rosa bella	5	1.4	0.32	106°0′30.86"	106°0′30.87"	2066.2	11	Uphill position
	2	Cotoneaster multiflorus	6	1.5	0.5
	3	Cornus macrophylla	3	1.6	0.3
	4	Philadelphus incanus	2	1.6	0.3
	5	Ostryopsis davidiana	8	1.3	0.35
	6	Spiraea ouensanensis	3	1.6	0.45
	7	Corylus mandshurica	5	1.5	0.3
	8	Lonicera ferdinandi	2	1.7	0.55
S70	1	Cornus macrophylla	7	1.6	0.3	106°0′28.94"	106°0′28.95"	2037.1	10	Uphill position
	2	Cotoneaster multiflorus	6	1.5	0.45
	3	Rosa bella	5	1.5	0.3
	4	Syringa oblata	5	1.4	0.35
	5	Hippophae rhamnoides	2	2.5	1.3
	6	Berberis brachypoda	4	1.4	0.4
	7	Ostryopsis davidiana	8	1.5	0.35
	8	Lonicera ferdinandi	3	1.7	0.5
	9	Spiraea ouensanensis	6	1.6	0.6
S71	1	Cotoneaster zabelii	8	1.6	0.5	106°9′34.77"	106°9′34.78"	2426	35	Uphill position
	2	Lonicera ferdinandi	5	1.7	0.45
	3	Rosa bella	6	1.4	0.31
	4	Cotoneaster multiflorus	7	1.5	0.55
	5	Crataegus kansuensis	4	2	1
	6	Syringa oblata	6	1.4	0.32
	7	Viburnum glomeratum	7	1.5	0.33
	8	8Spiraea ouensanensis	5	1.6	0.46
S72	1	Syringa oblata	7	1.5	0.34	106°8′21.03"	106°8′21.04"	2209	37	Downhill position
	2	Viburnum glomeratum	5	1.7	0.32
	3	Lonicera ferdinandi	4	1.6	0.56
	4	Rosa bella	6	1.4	0.33
	5	Cotoneaster multiflorus	8	1.6	0.45
	6	Berberis brachypoda	6	1.3	0.42
	7	Crataegus kansuensis	5	2.5	1.2
	8	Spiraea ouensanensis	4	1.4	0.5
	9	Rhamnus parvifolia	6	1.3	0.42
	10	Ostryopsis davidiana	8	1.2	0.31
S73	1	Viburnum opulus subsp.	11	2.1	0.7	106°15′15.1″	106°15′15.2″	2181.8	23	Downhill position
	2	Euonymus oxyphyllus	5	1.8	1.2
	3	Viburnum glomeratum	3	1.6	0.55
	4	Syringa oblata	5	1.7	0.5
	5	Fargesia nitida	5	0.8	0.35
	6	Berberis brachypoda	3	1.2	0.25
	7	Crataegus kansuensis	4	2.2	1.2
	8	Euonymus verrucosus	2	1.8	1.6
	9	Lonicera maackii	2	2.3	1.1
	10	Smilax stans	2	0.5	0.4
	11	Viburnum mongolicum	4	0.9	0.23
	12	Corylus mandshurica	2	2.1	0.55
	13	Litsea pungens	1	0.5	0.45
	14	Rosa bella	1	1.2	0.9
	15	Ulmus pumila	1	0.4	0.45
	16	Prunus tomentosa	1	0.4	0.5
S74	1	Viburnum opulus subsp.	4	1.7	0.4	106°15′19.76″	106°15′19.77″	2164.9	5	Downhill position
	2	Fargesia nitida	10	0.9	0.3
	3	Euonymus oxyphyllus	3	1.8	1.2
	4	Syringa oblata	7	1.7	0.9
	5	Viburnum mongolicum	4	1.1	0.35
	6	Viburnum glomeratum	5	1.3	0.45
	7	Corylus mandshurica	12	2.4	0.4
	8	Philadelphus incanus	7	2.3	0.3
	9	Ulmus pumila	3	1.7	1.2
	10	Litsea pungens	2	1.5	0.8
	11	Smilax stans	4	0.6	0.25
	12	Crataegus kansuensis	5	1.8	1
	13	Rosa bella	5	1.3	0.8
	14	Lonicera tangutica	2	1.2	0.8
S75	1	Euonymus oxyphyllus	2	1.7	1	106°15′56.29″	106°15′56.30″	2088.3	47	Downhill position
	2	Euonymus verrucosus	3	1.8	1.1
	3	Ulmus pumila	2	0.8	0.7
	4	Prunus tomentosa	3	0.7	0.6
	5	Viburnum mongolicum	4	1	0.25
	6	Viburnum glomeratum	5	1.5	0.6
	7	Litsea pungens	2	1.7	1.2
	8	Rosa bella	5	1.8	0.6
	9	Viburnum opulus subsp.	4	2	0.7
	10	Fargesia nitida	15	0.9	0.35
	11	Syringa oblata	7	1.6	0.6
	12	Berberis brachypoda	5	1.3	0.25
	13	Crataegus kansuensis	2	1.9	1.3
	14	Philadelphus incanus	3	2.2	1.2
	15	Cotoneaster multiflorus	6	1.9	0.54
S76	1	Euonymus oxyphyllus	3	1.7	1.3	106°16′45.74"	106°16′45.75"	2178	18	Downhill position
	2	Syringa oblata	9	1.7	0.4
	3	Fargesia nitida	20	0.8	0.3
	4	Crataegus kansuensis	4	2	1.3
	5	Euonymus verrucosus	2	1.7	1.1
	6	Viburnum mongolicum	7	0.5	0.4
	7	Corylus mandshurica	15	2	0.4
	8	Lonicera tangutica	3	1.4	0.6
	9	Cotoneaster multiflorus	9	2.2	0.65
	10	Philadelphus incanus	14	2.3	0.45
	11	Viburnum opulus subsp.	12	2	0.4
S77	1	Viburnum opulus subsp.	14	2.5	0.8	106°20′42.85"	106°20′42.86"	2071	22	Downhill position
	2	Fargesia nitida	21	1.2	0.4
	3	Lonicera chrysantha	4	1.4	0.58
	4	Crataegus kansuensis	3	2.6	1
	5	Lonicera stephanocarpa	4	2.3	0.55
	6	Berberis brachypoda	1	1.3	0.5
	7	Cotoneaster multiflorus	6	2.2	0.67
	8	Sorbaria sorbifolia	6	1.7	0.8
	9	Prunus salicina	2	2.5	1.4
	10	Rosa omeiensis f. pteracantha	5	1.8	0.7
S78	1	Syringa reticulata	54	2.5	0.5	106°21′3.33"	106°21′3.34"	2024	7	Mid slope position
	2	Cotoneaster multiflorus	60	2	0.45
	3	Spiraea blumei	10	0.5	0.35
	4	Berberis brachypoda	8	1	0.3
S79	1	Lonicera ferdinandi	4	1.6	0.54	106°18′40.41″	106°18′40.42″	2055	37	Mid slope position
	2	Viburnum glomeratum	6	1.8	0.34
	3	Cotoneaster multiflorus	9	1.6	0.51
	4	Syringa oblata	8	1.5	0.31
	5	Populus tomentosa	2	2.5	1.5
	6	Malus kansuensis	4	2	1.3
	7	Rosa bella	6	1.4	0.33
	8	Cotoneaster acutifolius	6	1.5	0.42
	9	Spiraea ouensanensis	5	1.5	0.45
S80	1	Berberis brachypoda	7	1.4	0.5	106°18′40.09″	106°18′40.10″	2021	16	Downhill position
	2	Cotoneaster multiflorus	8	1.6	0.55
	3	Cotoneaster zabelii	6	1.5	0.45
	4	Spiraea ouensanensis	5	1.4	0.4
	5	Rosa bella	6	1.5	0.35
	6	Ostryopsis davidiana	9	1.2	0.32
	7	Syringa oblata	6	1.5	0.36
	8	Lonicera ferdinandi	4	1.6	0.58
	9	Prunus tomentosa	2	2	1.2
S81	1	Quercus mongolica	5	2	1	106°19′7.38″	106°19′7.39″	1992	47	Downhill position
	2	Cotoneaster multiflorus	6	1.7	0.45
	3	Syringa oblata	4	1.4	0.31
	4	Ostryopsis davidiana	6	1.3	0.3
	5	Juniperus rigida	2	1.5	1
	6	Cotoneaster acutifolius	4	1.5	0.41
	7	Cotoneaster zabelii	5	1.3	0.44
	8	Viburnum glomeratum	4	1.7	0.31
	9	Lonicera ferdinandi	2	1.6	0.54
S82	1	Syringa oblata	20	1.6	0.4	106°16′22.35″	106°16′22.36″	2158.1	38	Downhill position
	2	Cotoneaster zabelii	8	1.8	0.45
	3	Cotoneaster multiflorus	10	1.7	0.51
	4	Ostryopsis davidiana	18	1	0.31
	5	Cotoneaster acutifolius	5	1.2	0.44
	6	Viburnum glomeratum	5	1.6	0.3
	7	Lonicera ferdinandi	3	1.7	0.54
	8	Hippophae rhamnoides	2	2	1.1
S83	1	Cornus macrophylla	13	1.8	0.35	106°16′18.49″	106°16′18.50″	2195	28	Downhill position
	2	Syringa oblata	15	1.6	0.33
	3	Cotoneaster multiflorus	17	1.6	0.52
	4	Rosa bella	5	1.5	0.42
	5	Crataegus kansuensis	5	2.5	1.2
	6	Hippophae rhamnoides	4	2	1.3
	7	Corylus mandshurica	6	1.5	0.3
S84	1	Corylus mandshurica	8	1.6	0.31	106°16′21.2″	106°16′21.3″	2167	7	Downhill position
	2	Cotoneaster multiflorus	10	1.5	0.45
	3	Prunus davidiana	4	2	1.3
	4	Syringa oblata	8	1.6	0.35
	5	Rosa bella	6	1.7	0.36
	6	Hippophae rhamnoides	4	2.5	1.1
	7	Lonicera ferdinandi	4	1.7	0.51
	8	Euonymus phellomanus	5	1.6	0.54
